# Supplementary material for: Apoptosis Enhances the Replication of Human Coronavirus OC43
Source: MDPI journal article supplement (doi:10.3390/v13112199), 2021-11-01
Supplement: s1 [file s1]

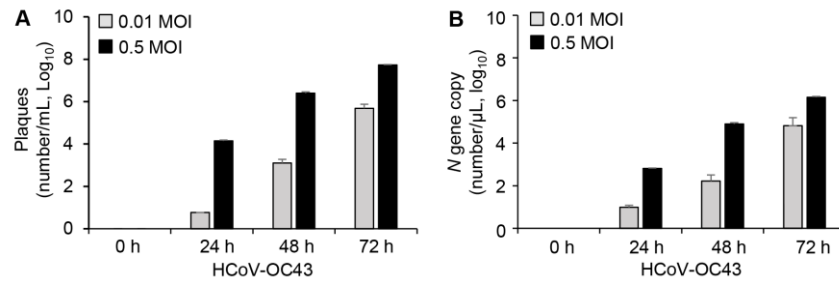

**Figure S1.** Multiplication of HCoV-OC43 in Vero cells. Vero ( $2 \times 10^5$  cells/well) were infected with HCoV-OC43 in 2 ml of DMEM containing 10% FBS at an MOI of 0.01 or 0.5 for 1 h ( $n=3$ ). At the indicated times after infection, supernatants were collected and analyzed. **(A)** Virus titers in the supernatants were determined by plaque assays. **(B)** Viral replication was quantified by RT-qPCR analysis for the HCoV-OC43 nucleocapsid (*N*) gene in the supernatants. Copy numbers of the *N* gene in 1  $\mu$ L of the cDNA samples were calculated using a standard curve obtained with cDNA of the *N* gene.

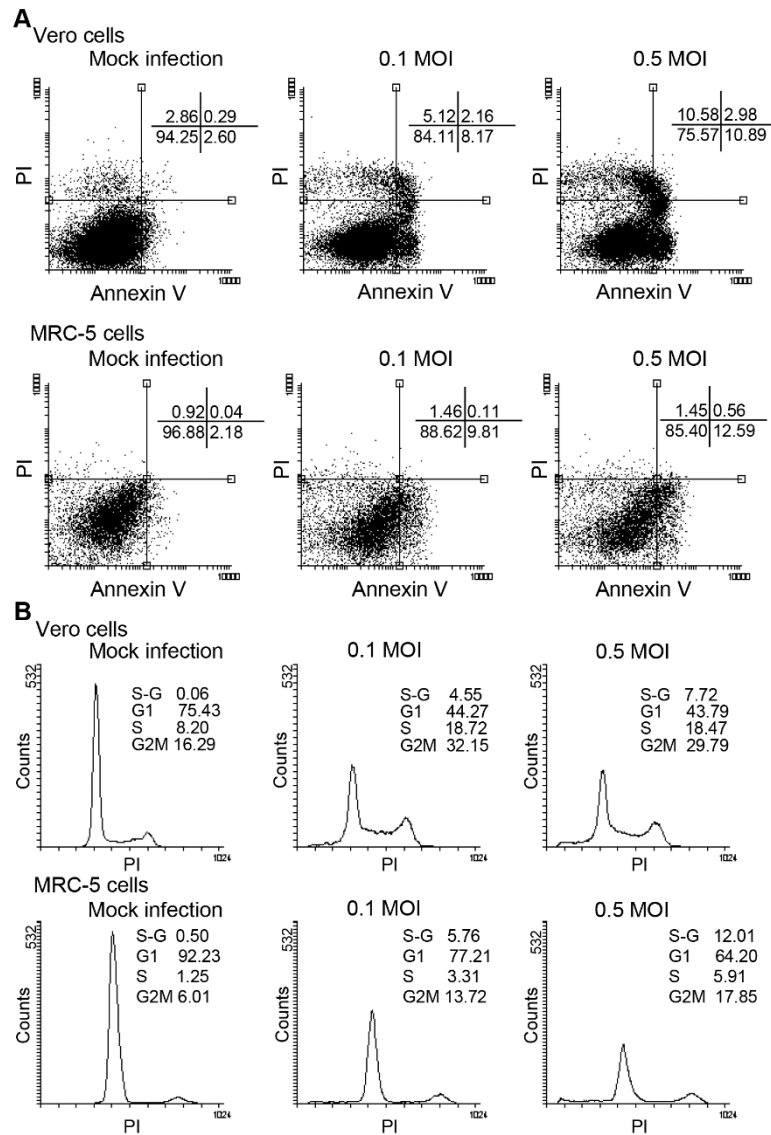

**Figure S2.** (Corresponding to Figure 2A and 2B) HCoV-OC43 infection triggers apoptosis in Vero and MRC-5 cells. Vero and MRC-5 cells were mock-infected with PBS or infected with HCoV-OC43 in PBS at an MOI of 0.1 or 0.5 for 1 h (n=3). The medium was replaced with DMEM containing 2% FBS or EMEM containing 2% FBS for Vero and MRC-5 cells, respectively. **(A)** Cells harvested at 72 h post-infection were stained with annexin V and PI and subjected to FACS analysis. **(B)** Cells were stained with PI at 72 h post-infection and the distribution of cells at various phases of the cell cycle was determined by flow cytometry. These results are representative of three independent experiments.

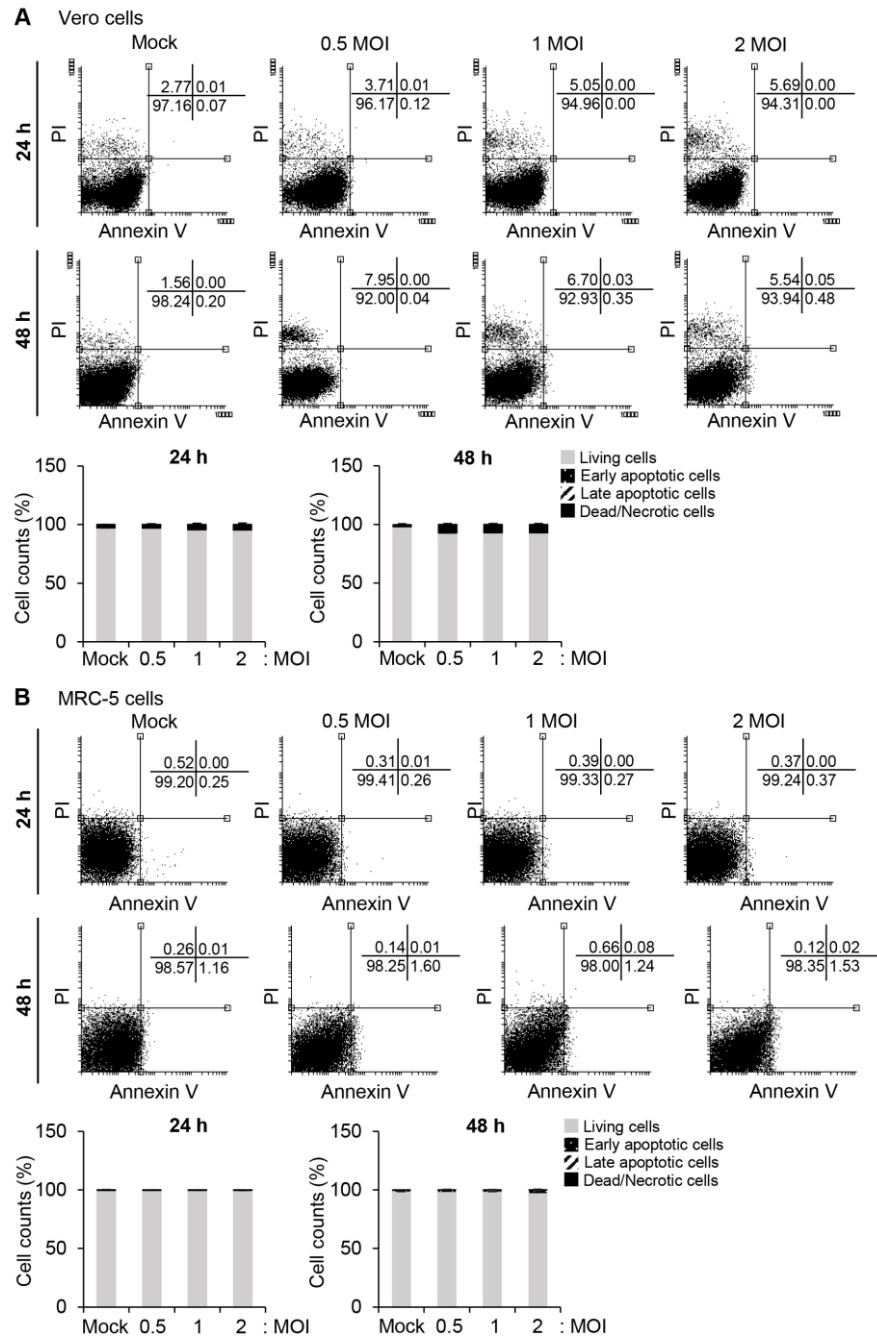

**Figure S3.** Effect of HCoV-OC43 infection at high MOI on apoptosis in Vero and MRC-5 cells. Vero (A) and MRC-5 (B) cells were mock-infected with PBS or infected with HCoV-OC43 in PBS at an MOI of 0.5, 1 or 2 for 1 h (n=3). The medium was replaced with DMEM containing 2% FBS or EMEM containing 2% FBS for Vero and MRC-5 cells, respectively. Cells harvested at 24 h and 48 h post-infection were stained with annexin V and PI and subjected to FACS analysis. The bar graphs show HCoV-OC43-induced apoptosis rates and percentage of cells.

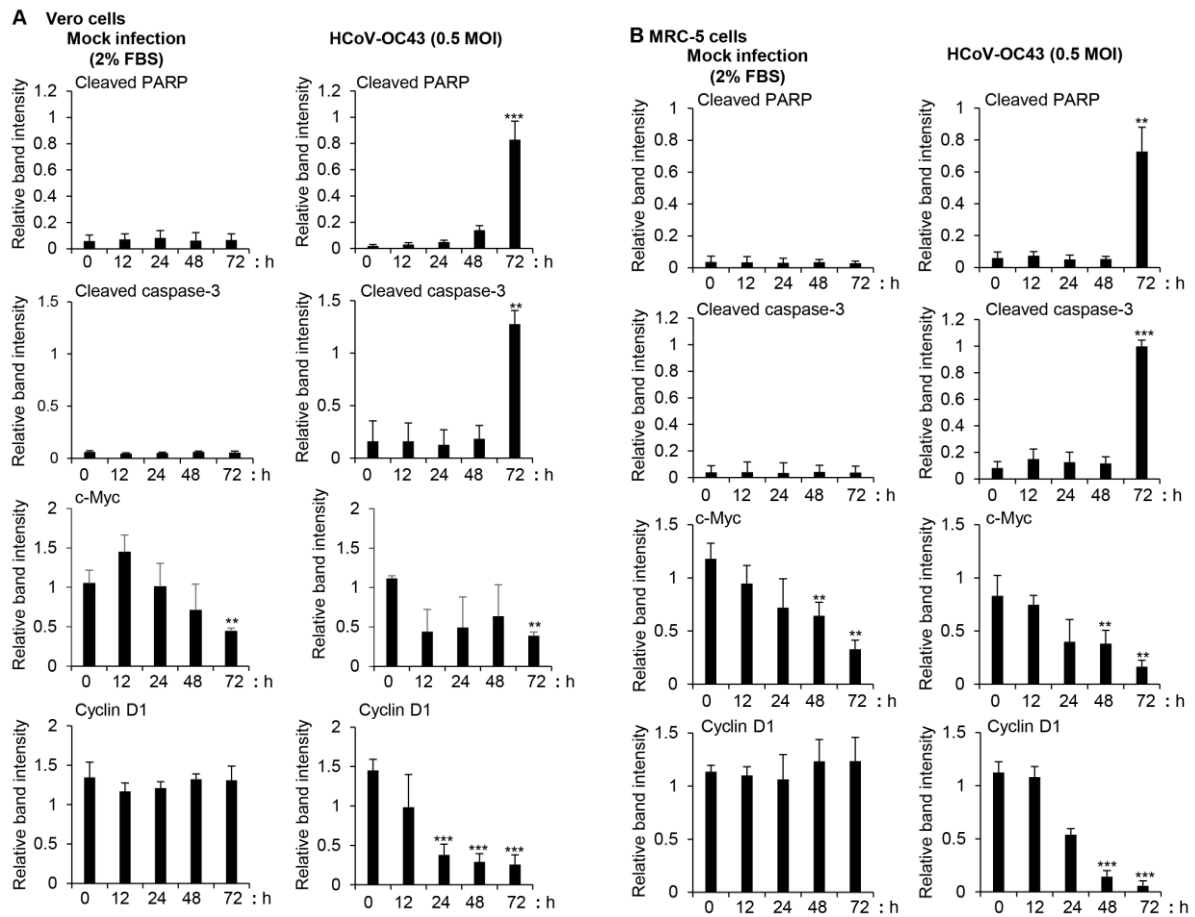

**Figure S4.** (Corresponding to Figure 3) Analysis of relative band densities from western blotting. **(A and B)** Vero **(A)** and MRC-5 **(B)** cells were infected with 0.5 MOI of HCoV-OC43 or without virus infection for the indicated times. After 1 h of incubation, the medium was replenished with DMEM or EMEM containing 2% FBS for Vero and MRC-5, respectively. After the indicated times of incubation, culture medium was removed and cell lysates were prepared, and Western blot analysis was performed to detect PARP, cleaved caspase-3, c-Myc, and cyclin D1.  $\beta$ -actin was used as the control. The band intensities were measured and normalized by  $\beta$ -actin amounts. The relative band intensities are shown on the graph. These results are obtained from three independent experiments. \* $p < 0.05$ , \*\* $p < 0.01$ , \*\*\* $p < 0.001$ .

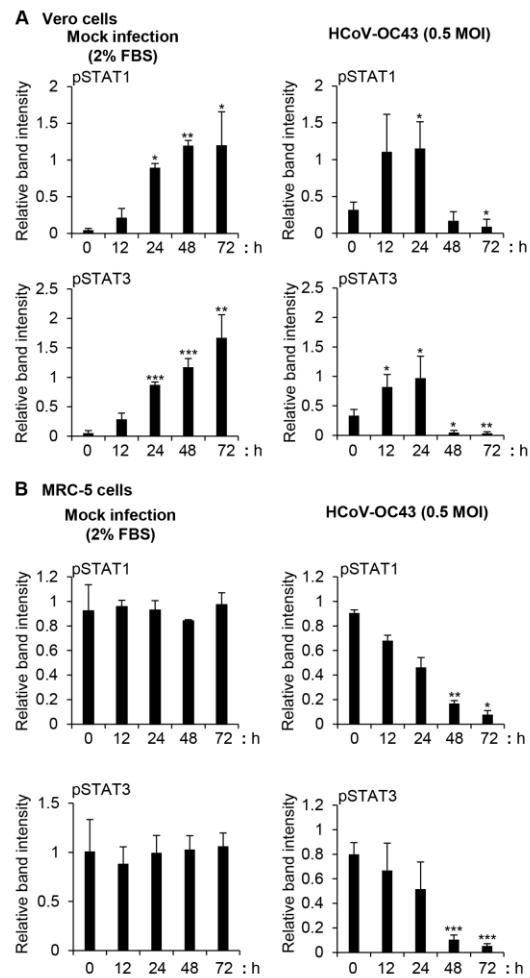

**Figure S5.** (Corresponding to Figure 4) Analysis of relative band densities from western blotting. (A and B) Vero (A) and MRC-5 (B) cells were infected with 0.5 MOI of HCoV-OC43 or without virus infection. After 1 h of incubation, the medium was replenished with DMEM or EMEM containing 2% FBS for Vero and MRC-5, respectively. After the indicated times of incubation, cell lysates were prepared, and Western blot analysis was performed to detect pSTAT1, STAT1, pSTAT3, STAT3.  $\beta$ -actin was used as the control. The band intensities were measured and normalized by  $\beta$ -actin amounts. The relative band intensities are shown on the graph. These results are representative of three independent experiments.

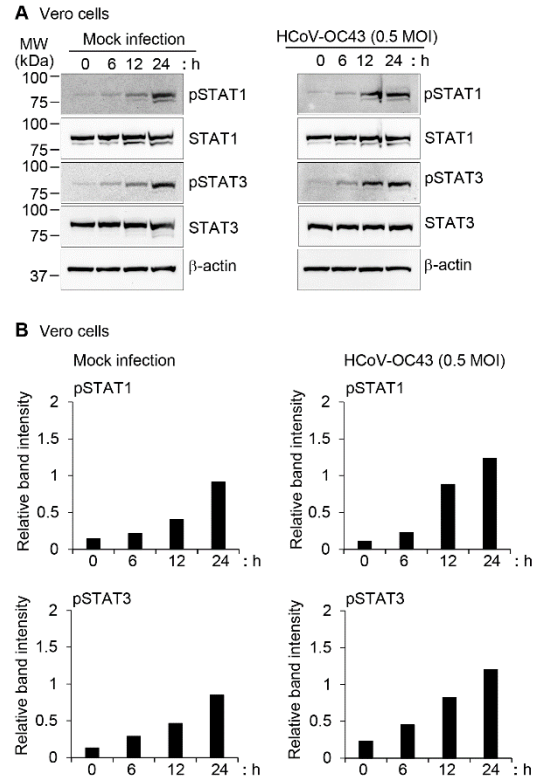

**Figure S6.** STAT1 and STAT3 phosphorylation at early HCoV-OC43 infection in Vero cells. **(A)** Vero cells were mock-infected with PBS or infected with HCoV-OC43 in PBS at an MOI of 0.5 for 1 h. The medium was replenished with DMEM containing 2% FBS, and cells were grown for the indicated times. At the indicated times after infection, cell lysates were examined by western blotting with antibodies against pSTAT1, STAT1, pSTAT3, STAT3.  $\beta$ -actin antibody was used to verify equal protein loading. **(B)** The band intensities were measured and normalized by  $\beta$ -actin amounts.

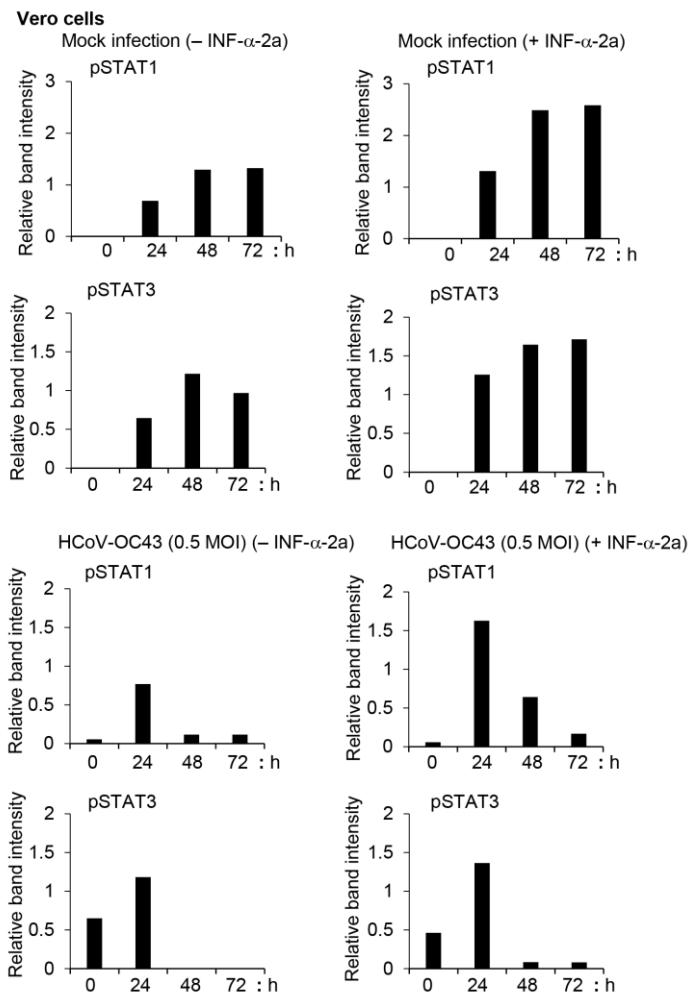

**Figure S7.** (Corresponding to Figure 6A) Analysis of relative band densities from western blotting. Vero cells were infected with 0.5 MOI of HCoV-OC43 or without virus infection. After 1 h of incubation, the medium was replenished with DMEM containing 2% FBS and 1,000 IU/ml of IFN- $\alpha$ -2a. After the indicated times of incubation, cell lysates were prepared, and western blot analysis was performed to detect pSTAT1, STAT1, pSTAT3, STAT3.  $\beta$ -actin was used as the control. The band intensities were measured and normalized by  $\beta$ -actin amounts. The relative band intensities are shown on the graph.
